# Supplementary material for: Adsorption of polycyclic aromatic hydrocarbons over CuZnFeAl–LDH modified by sodium dodecyl sulfate
Source: Royal Society of Chemistry journal article supplement (doi:10.1039/d2ra03968k), 2022-01-01
Supplement: d2ra03968k1.pdf [file d2ra03968k1.pdf]

## Adsorption of polycyclic aromatic hydrocarbons over CuZnFeAl-LDH modified by sodium dodecyl sulfate

Boqing LIU<sup>1a</sup>, Jingjing Cao<sup>1b</sup>, Yong JIANG<sup>2a</sup>, Shichang YAN<sup>3a</sup>, Haiming HE<sup>4a</sup>, Yu SHI<sup>5a</sup>, Songsong XU<sup>6a</sup>, Jinhua LIANG<sup>c\*</sup>, Xiaoqian REN<sup>a\*</sup>

(<sup>a</sup>School of Chemical Engineering, Nanjing University of Technology, <sup>b</sup>School of Environmental Science, Nanjing Xiaozhuang University, <sup>c</sup>School of Biotechnology and Pharmaceutical Engineering, Nanjing University of Technology, Nanjing, 211800, Jiangsu Province, China)

### 1.1 Adsorption thermodynamics

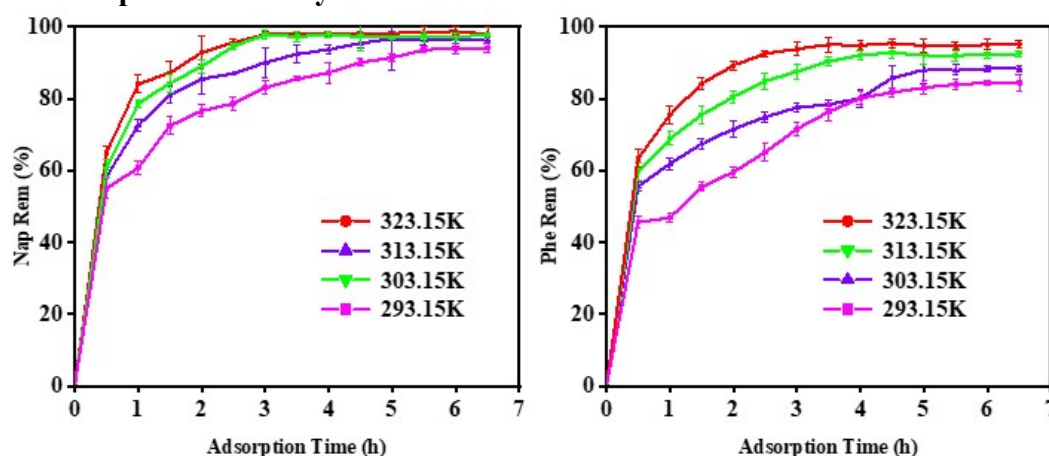

Fig. S1 The adsorption capacity of CuZnFeAl-S for (a) naphthalene and (b) phenanthrene with temperature.

### 1.2 Equilibrium adsorption capacity and equilibrium concentration

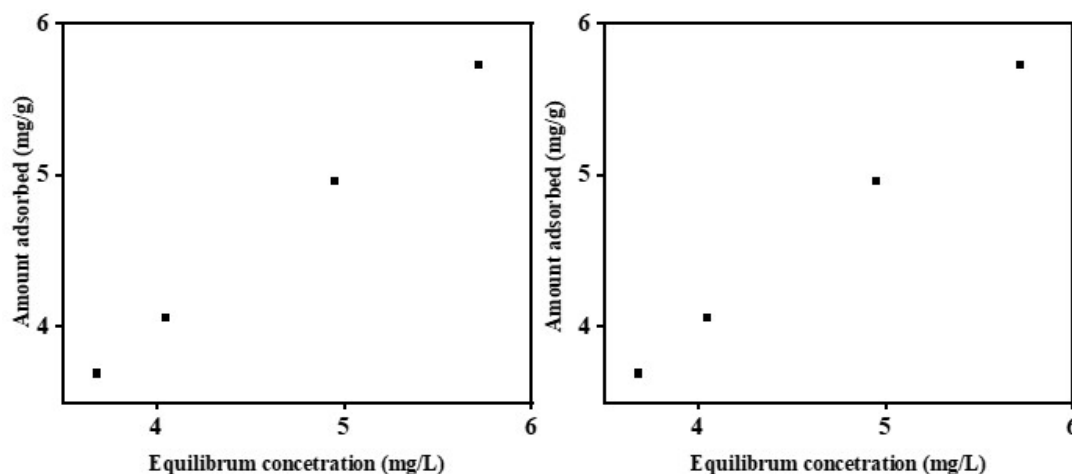

Fig. S2 Equilibrium adsorption capacity and equilibrium concentration of CuZnFeAl-S for (a) naphthalene and (b) phenanthrene adsorbents

Figure S1(a)(b) shows the adsorption performance of naphthalene and phenanthrene with temperature (from 293.15 K to 323.15 K), and Figure S2(a)(b) describes the relationship between the equilibrium adsorption capacity and the equilibrium concentration on CuZnFeAl-S, respectively.
